# Supplementary material for: A combination of metabolic labeling and 2D-DIGE analysis in response to a farnesyltransferase inhibitor facilitates the discovery of new prenylated proteins
Source: Royal Society of Chemistry journal article supplement (doi:10.1039/c3mb70593e), 2014-02-17
Supplement: c3mb70593e2.pdf [file c3mb70593e2.pdf]

|                                                                                                  |                    |         |      |      |      |      |      |      |      |      |      |
|--------------------------------------------------------------------------------------------------|--------------------|---------|------|------|------|------|------|------|------|------|------|
| Plectin OS=Homo sapiens<br>GN=PLEC PE=1 SV=3                                                     | sp Q15149 PLEC_HU  | 532 kDa | 100% | 100% | 100% | 100% |      |      | 100% | 100% | 100% |
| Triosephosphate isomerase<br>OS=Homo sapiens GN=TP11<br>PE=1 SV=3                                | sp P60174 TPIS_HU  | 31 kDa  |      |      |      | 100% | 67%  |      | 100% | 100% | 100% |
| Heat shock cognate 71 kDa<br>protein OS=Homo sapiens<br>GN=HSPA8 PE=1 SV=1                       | sp P11142 HSP7C_HU | 71 kDa  | 100% | 98%  | 100% |      | 98%  |      | 14%  |      | 100% |
| Voltage-dependent anion-<br>selective channel protein 1<br>OS=Homo sapiens<br>GN=VDAC1 PE=1 SV=2 | sp P21796 VDAC1_HU | 31 kDa  |      |      |      | 100% | 100% |      |      |      | 88%  |
| Stress-70 protein, mitochondrial<br>OS=Homo sapiens GN=HSPA9<br>PE=1 SV=2                        | sp P38646 GRP75_HU | 74 kDa  | 68%  | 100% | 100% | 100% | 68%  | 100% | 100% | 79%  | 100% |
| Mitochondrial-processing<br>peptidase subunit alpha<br>OS=Homo sapiens<br>GN=PMPCA PE=1 SV=2     | sp Q10713 MPPA_HU  | 58 kDa  | 100% | 100% | 100% |      |      |      | 16%  | 79%  |      |
| Carbamoyl-phosphate synthase<br>[ammonia], mitochondrial<br>OS=Homo sapiens GN=CPS1<br>PE=1 SV=2 | sp P31327 CPSM_HU  | 165 kDa | 100% | 100% | 100% | 100% | 68%  | 100% | 100% | 100% | 100% |
| 60 kDa heat shock protein,<br>mitochondrial OS=Homo<br>sapiens GN=HSPD1 PE=1<br>SV=2             | sp P10809 CH60_HU  | 61 kDa  |      | 100% | 100% | 100% | 100% | 100% | 100% | 77%  | 100% |
| Keratin, type I cytoskeletal 14<br>OS=Homo sapiens GN=KRT14<br>PE=1 SV=4                         | sp P02533 K1C14_HU | 52 kDa  | 100% | 100% | 100% | 100% |      | 100% | 84%  | 100% | 100% |
| Keratin, type II cytoskeletal 5<br>OS=Homo sapiens GN=KRT5<br>PE=1 SV=3                          | sp P13647 K2C5_HU  | 62 kDa  | 100% | 100% | 100% |      |      | 100% | 100% | 100% | 100% |
| Alkaline phosphatase, placental<br>type OS=Homo sapiens<br>GN=ALPP PE=1 SV=2                     | sp P05187 PPB1_HU  | 58 kDa  |      |      |      | 80%  |      |      |      |      | 100% |



|                                                                                                           |                    |         |      |      |      |      |      |      |      |
|-----------------------------------------------------------------------------------------------------------|--------------------|---------|------|------|------|------|------|------|------|
| Aspartate--tRNA ligase,<br>cytoplasmic OS=Homo sapiens<br>GN=DARS PE=1 SV=2                               | sp P14868 SYDC_H   | 57 kDa  | 100% | 100% | 100% |      |      |      |      |
| Tubulin alpha-1A chain<br>OS=Homo sapiens<br>GN=TUBA1A PE=1 SV=1                                          | sp Q71U36 TBA1A    | 50 kDa  | 100% | 100% | 100% | 100% |      | 100% | 100% |
| Pyruvate dehydrogenase protein<br>X component, mitochondrial<br>OS=Homo sapiens GN=PDHX<br>PE=1 SV=3      | sp O00330 ODPX_H   | 54 kDa  | 100% | 100% | 100% |      |      |      |      |
| Keratin, type I cytoskeletal 16<br>OS=Homo sapiens GN=KRT16<br>PE=1 SV=4                                  | sp P08779 K1C16_H  | 51 kDa  | 100% | 100% | 100% | 80%  | 100% |      | 100% |
| 4-trimethylaminobutyraldehyde<br>dehydrogenase OS=Homo<br>sapiens GN=ALDH9A1 PE=1<br>SV=3                 | sp P49189 AL9A1_H  | 54 kDa  | 100% | 100% | 100% |      |      |      |      |
| L-lactate dehydrogenase A<br>chain OS=Homo sapiens<br>GN=LDHA PE=1 SV=2                                   | sp P00338 LDHA_H   | 37 kDa  |      |      |      |      | 100% | 100% |      |
| Leucine-rich PPR motif-<br>containing protein,<br>mitochondrial OS=Homo<br>sapiens GN=LRPPRC PE=1<br>SV=3 | sp P42704 LRPPRC_H | 158 kDa |      |      | 100% | 100% |      | 74%  | 100% |
| Heat shock-related 70 kDa<br>protein 2 OS=Homo sapiens<br>GN=HSPA2 PE=1 SV=1                              | sp P54652 HSP72_H  | 70 kDa  | 16%  | 84%  | 100% | 80%  |      | 67%  | 100% |
| Aldehyde dehydrogenase,<br>mitochondrial OS=Homo<br>sapiens GN=ALDH2 PE=1<br>SV=2                         | sp P05091 ALDH2_H  | 56 kDa  |      |      | 100% | 100% |      |      |      |
| Prohibitin-2 OS=Homo sapiens<br>GN=PHB2 PE=1 SV=2                                                         | sp Q99623 PHB2_H   | 33 kDa  |      |      |      |      | 100% | 100% |      |
| Eukaryotic initiation factor 4A-I<br>OS=Homo sapiens GN=EIF4A1<br>PE=1 SV=1                               | sp P60842 IF4A1_H  | 46 kDa  |      |      |      | 100% |      | 79%  | 73%  |

|                                                                                   |                     |         |      |      |      |      |      |      |      |      |
|-----------------------------------------------------------------------------------|---------------------|---------|------|------|------|------|------|------|------|------|
| Actin, cytoplasmic 1 OS=Homo sapiens GN=ACTB PE=1 SV=1                            | sp P60709 ACTB_H    | 42 kDa  | 100% | 100% | 100% | 100% |      | 69%  | 100% | 100% |
| Heat shock 70 kDa protein 1-like OS=Homo sapiens GN=HSPA1L PE=1 SV=2              | sp P34931 HS71L_H   | 70 kDa  | 43%  | 70%  | 69%  |      | 100% |      | 75%  | 100% |
| Alpha-aminoadipic semialdehyde dehydrogenase OS=Homo sapiens GN=ALDH7A1 PE=1 SV=5 | sp P49419 AL7A1_H   | 58 kDa  | 100% | 100% | 100% |      |      |      |      |      |
| Heterogeneous nuclear ribonucleoprotein K OS=Homo sapiens GN=HNRNPK PE=1 SV=1     | sp P61978 HNRPK_    | 51 kDa  | 100% | 100% | 100% | 100% |      | 100% |      | 100% |
| Actin, aortic smooth muscle OS=Homo sapiens GN=ACTA2 PE=1 SV=1                    | sp P62736 ACTA_H    | 42 kDa  | 100% | 100% | 100% | 100% |      | 74%  | 100% | 100% |
| Transferrin receptor protein 1 OS=Homo sapiens GN=TFRC PE=1 SV=2                  | sp P02786 TFR1_HU   | 85 kDa  | 100% | 100% | 100% | 100% |      | 100% | 77%  | 79%  |
| Keratinocyte proline-rich protein OS=Homo sapiens GN=KPRP PE=1 SV=1               | sp Q5T749 KPRP_H    | 64 kDa  | 100% | 100% | 100% |      | 100% | 100% | 100% |      |
| Nucleoprotein TPR OS=Homo sapiens GN=TPR PE=1 SV=3                                | sp P12270 TPR_HU    | 267 kDa | 100% | 100% | 100% | 100% |      |      | 79%  | 100% |
| GTP-binding nuclear protein Ran OS=Homo sapiens GN=RAN PE=1 SV=3                  | sp P62826 RAN_HU    | 24 kDa  |      |      |      |      |      | 100% | 100% |      |
| Serum albumin precursor (Allergen Bos d 6) (BSA) cRAP                             | gi 1351907 sp P0276 | 69 kDa  | 100% | 100% | 100% | 100% | 68%  | 100% |      | 78%  |
| Keratin, type I cytoskeletal 13 OS=Homo sapiens GN=KRT13 PE=1 SV=4                | sp P13646 K1C13_H   | 50 kDa  | 100% | 100% | 100% | 99%  |      | 100% | 100% | 100% |
| ATP-dependent RNA helicase A OS=Homo sapiens GN=DHX9 PE=1 SV=4                    | sp Q08211 DHX9_H    | 141 kDa |      |      | 69%  | 100% |      | 100% | 15%  | 100% |
| Serine hydroxymethyltransferase, mitochondrial OS=Homo sapiens GN=SHMT2 PE=1 SV=3 | sp P34897 GLYM_H    | 56 kDa  | 100% | 100% | 100% |      |      |      |      |      |

|                                                                                                       |                   |        |      |      |      |      |      |      |      |      |      |      |
|-------------------------------------------------------------------------------------------------------|-------------------|--------|------|------|------|------|------|------|------|------|------|------|
| Heterogeneous nuclear ribonucleoproteins A2/B1<br>OS=Homo sapiens<br>GN=HNRNPA2B1 PE=1 SV=2           | sp P22626 ROA2_H  | 37 kDa |      |      |      |      | 100% | 100% |      | 99%  |      |      |
| Alpha-enolase OS=Homo sapiens<br>GN=ENO1 PE=1 SV=2                                                    | sp P06733 ENOA_H  | 47 kDa | 100% | 100% | 100% | 100% |      |      |      | 100% |      | 100% |
| Succinyl-CoA:3-ketoacid coenzyme A transferase 1, mitochondrial OS=Homo sapiens<br>GN=OXCT1 PE=1 SV=1 | sp P55809 SCOT1_H | 56 kDa | 100% | 100% | 100% |      |      |      |      |      |      |      |
| WD repeat-containing protein 82 OS=Homo sapiens<br>GN=WDR82 PE=1 SV=1                                 | sp Q6UXN9 WDR82_H | 35 kDa |      |      |      |      | 100% | 100% |      |      |      |      |
| RuvB-like 1 OS=Homo sapiens<br>GN=RUVBL1 PE=1 SV=1                                                    | sp Q9Y265 RUVB1_H | 50 kDa | 100% | 100% | 100% |      |      |      |      |      |      | 100% |
| Keratin, type II cytoskeletal 7 OS=Homo sapiens<br>GN=KRT7 PE=1 SV=5                                  | sp P08729 K2C7_HU | 51 kDa | 68%  | 100% | 100% |      |      |      |      |      |      |      |
| Glyceraldehyde-3-phosphate dehydrogenase OS=Homo sapiens<br>GN=GAPDH PE=1 SV=3                        | sp P04406 G3P_HU  | 36 kDa | 100% |      | 100% | 19%  | 100% | 100% |      | 100% | 74%  | 88%  |
| D-3-phosphoglycerate dehydrogenase OS=Homo sapiens<br>GN=PHGDH PE=1 SV=4                              | sp O43175 SERA_H  | 57 kDa | 100% | 100% | 100% |      |      |      |      | 100% |      |      |
| Cytosol aminopeptidase OS=Homo sapiens<br>GN=LAP3 PE=1 SV=3                                           | sp P28838 AMPL_H  | 56 kDa | 100% | 100% | 100% |      |      |      |      |      |      |      |
| Cytochrome b-c1 complex subunit 1, mitochondrial OS=Homo sapiens<br>GN=UQCRC1 PE=1 SV=3               | sp P31930 QCR1_HU | 53 kDa |      |      |      |      | 100% |      |      |      | 100% | 73%  |
| Peroxiredoxin-6 OS=Homo sapiens<br>GN=PRDX6 PE=1 SV=3                                                 | sp P30041 PRDX6_H | 25 kDa |      |      |      |      |      | 100% | 100% |      |      |      |

|                                                                                          |                   |         |      |      |      |      |      |      |      |      |
|------------------------------------------------------------------------------------------|-------------------|---------|------|------|------|------|------|------|------|------|
| Ubiquitin-like modifier-activating enzyme 1 OS=Homo sapiens GN=UBA1 PE=1 SV=3            | sp P22314 UBA1_H  | 118 kDa | 100% | 100% | 100% | 80%  |      |      |      | 100% |
| Intestinal-type alkaline phosphatase OS=Homo sapiens GN=ALPI PE=1 SV=2                   | sp P09923 PPBI_HU | 57 kDa  |      | 100% |      |      |      |      |      | 100% |
| ATP synthase subunit d, mitochondrial OS=Homo sapiens GN=ATP5H PE=1 SV=3                 | sp O75947 ATP5H_H | 18 kDa  |      |      |      |      |      | 100% |      |      |
| Spectrin alpha chain, non-erythrocytic 1 OS=Homo sapiens GN=SPTAN1 PE=1 SV=3             | sp Q13813 SPTN1_H | 285 kDa |      |      | 100% | 80%  |      |      |      | 100% |
| Malate dehydrogenase, mitochondrial OS=Homo sapiens GN=MDH2 PE=1 SV=3                    | sp P40926 MDHM_H  | 36 kDa  |      |      |      |      | 100% | 100% |      |      |
| Vinculin OS=Homo sapiens GN=VCL PE=1 SV=4                                                | sp P18206 VINC_HU | 124 kDa | 100% | 100% | 100% | 80%  |      |      |      |      |
| Pre-mRNA-processing factor 19 OS=Homo sapiens GN=PRPF19 PE=1 SV=1                        | sp Q9UMS4 PRP19_H | 55 kDa  | 100% | 100% | 100% |      |      |      | 79%  |      |
| ATP synthase subunit beta, mitochondrial OS=Homo sapiens GN=ATP5B PE=1 SV=3              | sp P06576 ATPB_HU | 57 kDa  |      |      | 69%  |      |      |      | 100% | 100% |
| Spectrin beta chain, non-erythrocytic 1 OS=Homo sapiens GN=SPTBN1 PE=1 SV=2              | sp Q01082 SPTB2_H | 275 kDa |      |      | 69%  | 100% |      |      |      | 100% |
| Heat shock 70 kDa protein 1A/1B OS=Homo sapiens GN=HSPA1A PE=1 SV=5                      | sp P08107 HSP71_H | 70 kDa  |      |      | 69%  |      |      | 100% |      | 100% |
| Heterogeneous nuclear ribonucleoprotein A1-like 2 OS=Homo sapiens GN=HNRNPA1L2 PE=2 SV=2 | sp Q32P51 RA1L2_H | 34 kDa  |      |      |      |      | 100% | 100% |      |      |







|                                                                                                                                    |                   |         |      |      |      |      |      |      |      |          |
|------------------------------------------------------------------------------------------------------------------------------------|-------------------|---------|------|------|------|------|------|------|------|----------|
| Keratin, type I cytoskeletal 17<br>OS=Homo sapiens GN=KRT17<br>PE=1 SV=2                                                           | sp Q04695 K1C17_H | 48 kDa  | 68%  |      | 69%  | 100% |      | 74%  | 100% | 100%     |
| T-complex protein 1 subunit<br>zeta OS=Homo sapiens<br>GN=CCT6A PE=1 SV=3                                                          | sp P40227 TCPZ_HU | 58 kDa  |      | 98%  | 99%  |      | 67%  | 100% | 100% |          |
| Splicing factor, proline- and<br>glutamine-rich OS=Homo<br>sapiens GN=SFPQ PE=1 SV=2                                               | sp P23246 SFPQ_HU | 76 kDa  | 100% | 100% | 100% |      |      | 92%  |      |          |
| Polypyrimidine tract-binding<br>protein 1 OS=Homo sapiens<br>GN=PTBP1 PE=1 SV=1                                                    | sp P26599 PTBP1_H | 57 kDa  | 100% | 100% | 100% |      | 67%  |      |      |          |
| Serine/threonine-protein<br>phosphatase 2A 55 kDa<br>regulatory subunit B alpha<br>isoform OS=Homo sapiens<br>GN=PPP2R2A PE=1 SV=1 | sp P63151 2ABA_HU | 52 kDa  | 100% | 100% | 100% |      |      |      |      |          |
| Heterogeneous nuclear<br>ribonucleoprotein Q OS=Homo<br>sapiens GN=SYNCRIP PE=1<br>SV=2                                            | sp O60506 HNRPQ   | 70 kDa  |      | 68%  | 26%  | 100% |      |      |      | 100%     |
| Heterogeneous nuclear<br>ribonucleoprotein M OS=Homo<br>sapiens GN=HNRNPM PE=1<br>SV=3                                             | sp P52272 HNRPM   | 78 kDa  |      |      |      |      | 100% | 100% | 56%  |          |
| Hydroxyacyl-coenzyme A<br>dehydrogenase, mitochondrial<br>OS=Homo sapiens GN=HADH<br>PE=1 SV=3                                     | sp Q16836 HCDH_H  | 34 kDa  |      |      |      |      | 100% | 100% |      |          |
| U2 small nuclear<br>ribonucleoprotein B' OS=Homo<br>sapiens GN=SNRNPB2 PE=1<br>SV=1                                                | sp P08579 RU2B_HU | 25 kDa  |      |      |      |      |      | 100% | 100% |          |
| Nuclear mitotic apparatus<br>protein 1 OS=Homo sapiens<br>GN=NUMA1 PE=1 SV=2                                                       | sp Q14980 NUMA1   | 238 kDa |      |      | 99%  |      |      |      |      | 100%     |
| Trypsin-1 OS=Homo sapiens<br>GN=PRSS1 PE=1 SV=1                                                                                    | sp P07477 TRY1_HU | 27 kDa  | 68%  | 13%  | 100% |      | 68%  | 67%  | 100% | 100% 88% |
| Histone H2A type 1-A<br>OS=Homo sapiens<br>GN=HIST1H2AA PE=1 SV=3                                                                  | sp Q96QV6 H2A1A   | 14 kDa  |      | 100% |      | 80%  |      | 99%  | 99%  | 99%      |

|                                                                                           |                   |         |      |      |      |      |      |      |      |
|-------------------------------------------------------------------------------------------|-------------------|---------|------|------|------|------|------|------|------|
| Vimentin OS=Homo sapiens<br>GN=VIM PE=1 SV=4                                              | sp P08670 VIME_HU | 54 kDa  |      | 70%  | 100% |      | 100% | 77%  | 100% |
| Isoleucine--tRNA ligase,<br>cytoplasmic OS=Homo sapiens<br>GN=IARS PE=1 SV=2              | sp P41252 SYIC_HU | 145 kDa | 100% | 100% | 98%  | 100% |      |      |      |
| Bifunctional glutamate/proline--<br>tRNA ligase OS=Homo sapiens<br>GN=EPRS PE=1 SV=5      | sp P07814 SYEP_HU | 171 kDa | 100% | 100% | 99%  |      |      |      |      |
| Putative heat shock protein HSP<br>90-beta-3 OS=Homo sapiens<br>GN=HSP90AB3P PE=5 SV=1    | sp Q58FF7 H90B3_H | 68 kDa  |      |      |      | 100% |      |      | 100% |
| Mitochondrial import receptor<br>subunit TOM70 OS=Homo<br>sapiens GN=TOMM70A PE=1<br>SV=1 | sp O94826 TOM70_H | 67 kDa  |      |      |      |      | 79%  |      | 100% |
| Splicing factor 45 OS=Homo<br>sapiens GN=RBM17 PE=1<br>SV=1                               | sp Q96125 SPF45_H | 45 kDa  |      |      |      | 100% |      |      | 17%  |
| Actin-like protein 6A<br>OS=Homo sapiens<br>GN=ACTL6A PE=1 SV=1                           | sp O96019 ACL6A_H | 47 kDa  |      |      |      |      | 100% |      |      |
| 26S protease regulatory subunit<br>7 OS=Homo sapiens<br>GN=PSMC2 PE=1 SV=3                | sp P35998 PRS7_HU | 49 kDa  |      |      |      |      | 100% |      |      |
| Sorting nexin-1 OS=Homo<br>sapiens GN=SNX1 PE=1 SV=3                                      | sp Q13596 SNX1_H  | 59 kDa  |      |      |      |      |      |      | 100% |
| Glutamate dehydrogenase 1,<br>mitochondrial OS=Homo<br>sapiens GN=GLUD1 PE=1<br>SV=2      | sp P00367 DHE3_HU | 61 kDa  | 100% | 70%  | 100% |      | 100% |      |      |
| Filaggrin-2 OS=Homo sapiens<br>GN=FLG2 PE=1 SV=1                                          | sp Q5D862 FILA2_H | 248 kDa |      | 70%  | 69%  |      | 100% | 100% |      |
| Fatty acid synthase OS=Homo<br>sapiens GN=FASN PE=1 SV=3                                  | sp P49327 FAS_HU  | 273 kDa |      | 100% | 100% | 100% |      |      |      |
| Interleukin enhancer-binding<br>factor 3 OS=Homo sapiens<br>GN=ILF3 PE=1 SV=3             | sp Q12906 ILF3_HU | 95 kDa  | 98%  | 100% | 100% |      |      |      |      |

|                                                                                                                          |                      |         |      |      |      |      |     |      |      |     |      |      |
|--------------------------------------------------------------------------------------------------------------------------|----------------------|---------|------|------|------|------|-----|------|------|-----|------|------|
| Guanine nucleotide-binding protein subunit beta-2-like 1<br>OS=Homo sapiens<br>GN=GNB2L1 PE=1 SV=3                       | sp P63244 GBLP_HU    | 35 kDa  |      |      | 100% | 100% |     | 74%  |      |     |      |      |
| Pyrroline-5-carboxylate reductase 2<br>OS=Homo sapiens<br>GN=PYCR2 PE=1 SV=1                                             | sp Q96C36 P5CR2_HU   | 34 kDa  |      |      | 100% | 100% |     |      |      |     |      |      |
| AFG3-like protein 2<br>OS=Homo sapiens<br>GN=AFG3L2 PE=1 SV=2                                                            | sp Q9Y4W6 AFG32_HU   | 89 kDa  | 100% | 100% |      |      |     |      |      |     |      |      |
| Coiled-coil-helix-coiled-coil-helix domain-containing protein 3, mitochondrial<br>OS=Homo sapiens<br>GN=CHCHD3 PE=1 SV=1 | sp Q9NX63 CHCH3_HU   | 26 kDa  |      |      |      |      |     | 100% | 77%  |     |      |      |
| Kinectin<br>OS=Homo sapiens<br>GN=KTN1 PE=1 SV=1                                                                         | sp Q86UP2 KTN1_HU    | 156 kDa | 69%  |      |      |      |     |      |      |     |      | 100% |
| Alpha-actinin-4<br>OS=Homo sapiens<br>GN=ACTN4 PE=1 SV=2                                                                 | sp O43707 ACTN4_HU   | 105 kDa |      |      |      |      |     |      |      |     |      | 100% |
| Myosin-10<br>OS=Homo sapiens<br>GN=MYH10 PE=1 SV=3                                                                       | sp P35580 MYH10_HU   | 229 kDa |      |      |      |      |     |      |      |     |      | 100% |
| Chromobox protein homolog 3<br>OS=Homo sapiens<br>GN=CBX3 PE=1 SV=4                                                      | sp Q13185 CBX3_HU    | 21 kDa  |      |      |      |      |     |      |      |     | 100% |      |
| Evolutionarily conserved signaling intermediate in Toll pathway, mitochondrial<br>OS=Homo sapiens<br>GN=ECSIT PE=1 SV=1  | sp Q9BQ95 ECSIT_HU   | 49 kDa  |      |      |      | 100% |     |      |      |     |      |      |
| Cationic trypsin precursor (Beta-trypsin) [Contains: Alpha-trypsin chain 1; Alpha-trypsin chain 2] cRAP                  | gij 2507249 sp P0076 | 25 kDa  | 69%  |      | 68%  | 67%  | 84% | 74%  | 100% | 79% | 100% |      |
| Keratin, type II cytoskeletal 6B<br>OS=Homo sapiens<br>GN=KRT6B PE=1 SV=5                                                | sp P04259 K2C6B_HU   | 60 kDa  | 100% | 100% | 100% |      |     | 100% | 77%  |     |      |      |
| Tubulin beta chain<br>OS=Homo sapiens<br>GN=TUBB PE=1 SV=2                                                               | sp P07437 TBB5_HU    | 50 kDa  | 68%  | 59%  | 100% | 99%  |     |      |      |     |      | 100% |

|                                                                                            |                   |         |      |      |      |      |      |      |
|--------------------------------------------------------------------------------------------|-------------------|---------|------|------|------|------|------|------|
| Transitional endoplasmic reticulum ATPase OS=Homo sapiens GN=VCP PE=1 SV=4                 | sp P55072 TERA_H  | 89 kDa  | 68%  | 70%  | 100% |      |      | 100% |
| Annexin A11 OS=Homo sapiens GN=ANXA11 PE=1 SV=1                                            | sp P50995 ANX11_H | 54 kDa  |      | 100% | 100% |      | 100% |      |
| Transgelin-2 OS=Homo sapiens GN=TAGLN2 PE=1 SV=3                                           | sp P37802 TAGL2_H | 22 kDa  |      |      |      |      | 100% |      |
| V-type proton ATPase catalytic subunit A OS=Homo sapiens GN=ATP6V1A PE=1 SV=2              | sp P38606 VATA_HU | 68 kDa  |      |      |      |      |      | 100% |
| Cytoskeleton-associated protein 4 OS=Homo sapiens GN=CKAP4 PE=1 SV=2                       | sp Q07065 CKAP4_H | 66 kDa  |      |      |      |      |      | 100% |
| UDP-glucose:glycoprotein glucosyltransferase 1 OS=Homo sapiens GN=UGGT1 PE=1 SV=3          | sp Q9NYU2 UGGG1_H | 177 kDa |      |      |      |      |      | 100% |
| Tyrosine-protein phosphatase non-receptor type 1 OS=Homo sapiens GN=PTPN1 PE=1 SV=1        | sp P18031 PTN1_HU | 50 kDa  | 68%  | 100% | 100% | 80%  |      |      |
| Delta-1-pyrroline-5-carboxylate synthase OS=Homo sapiens GN=ALDH18A1 PE=1 SV=2             | sp P54886 P5CS_HU | 87 kDa  | 68%  | 70%  |      |      | 98%  | 100% |
| Mitochondrial inner membrane protein OS=Homo sapiens GN=IMMT PE=1 SV=1                     | sp Q16891 IMMT_H  | 84 kDa  |      | 40%  | 98%  | 100% |      | 79%  |
| Lamina-associated polypeptide 2, isoform alpha OS=Homo sapiens GN=TMPO PE=1 SV=2           | sp P42166 LAP2A_H | 75 kDa  | 68%  | 100% | 100% |      | 34%  |      |
| Dihydrolipoyl dehydrogenase, mitochondrial OS=Homo sapiens GN=DLD PE=1 SV=2                | sp P09622 DLDH_H  | 54 kDa  | 100% | 100% | 100% |      |      |      |
| Thioredoxin-dependent peroxide reductase, mitochondrial OS=Homo sapiens GN=PRDX3 PE=1 SV=3 | sp P30048 PRDX3_H | 28 kDa  | 100% | 100% |      |      |      | 100% |

|                                                                                                                            |                    |         |      |      |      |      |
|----------------------------------------------------------------------------------------------------------------------------|--------------------|---------|------|------|------|------|
| Fascin OS=Homo sapiens<br>GN=FSCN1 PE=1 SV=3                                                                               | sp Q16658 FSCN1_H  | 55 kDa  | 100% | 100% | 100% |      |
| Phosphatidylinositol 4-kinase<br>type 2-alpha OS=Homo sapiens<br>GN=PI4K2A PE=1 SV=1                                       | sp Q9BTU6 P4K2A_H  | 54 kDa  | 68%  | 100% | 100% |      |
| Heterogeneous nuclear<br>ribonucleoprotein F OS=Homo<br>sapiens GN=HNRNPF PE=1<br>SV=3                                     | sp P52597 HNRNPF_H | 46 kDa  |      | 47%  |      | 100% |
| Citrate synthase, mitochondrial<br>OS=Homo sapiens GN=CS<br>PE=1 SV=2                                                      | sp O75390 CISY_HU  | 52 kDa  |      |      | 80%  | 100% |
| Acylpyruvase FAHD1,<br>mitochondrial OS=Homo<br>sapiens GN=FAHD1 PE=1<br>SV=2                                              | sp Q6P587 FAHD1_H  | 25 kDa  |      |      |      | 100% |
| Heat shock protein HSP 90-beta<br>OS=Homo sapiens<br>GN=HSP90AB1 PE=1 SV=4                                                 | sp P08238 HS90B_H  | 83 kDa  |      |      | 100% | 100% |
| Eukaryotic translation initiation<br>factor 3 subunit F OS=Homo<br>sapiens GN=EIF3F PE=1 SV=1                              | sp O00303 EIF3F_H  | 38 kDa  |      |      | 100% | 100% |
| Cob(I)yrinic acid a,c-diamide<br>adenosyltransferase,<br>mitochondrial OS=Homo<br>sapiens GN=MMAB PE=1<br>SV=1             | sp Q96EY8 MMAB_H   | 27 kDa  |      |      |      | 100% |
| Cathepsin D OS=Homo sapiens<br>GN=CTSD PE=1 SV=1                                                                           | sp P07339 CATD_H   | 45 kDa  |      |      | 100% |      |
| Chromodomain-helicase-DNA-<br>binding protein 4 OS=Homo<br>sapiens GN=CHD4 PE=1 SV=2                                       | sp Q14839 CHD4_H   | 218 kDa |      |      |      | 100% |
| [Pyruvate dehydrogenase<br>[acetyl-transferring]]-<br>phosphatase 1, mitochondrial<br>OS=Homo sapiens GN=PDP1<br>PE=1 SV=3 | sp Q9P0J1 PDP1_HU  | 61 kDa  |      |      | 100% |      |

|                                                                                           |                   |         |     |      |      |      |      |      |      |
|-------------------------------------------------------------------------------------------|-------------------|---------|-----|------|------|------|------|------|------|
| Putative beta-actin-like protein 3 OS=Homo sapiens GN=POTEKP PE=5 SV=1                    | sp Q9BYX7 ACTBM   | 42 kDa  |     |      | 69%  | 80%  |      | 100% | 100% |
| Elongation factor 1-gamma OS=Homo sapiens GN=EEF1G PE=1 SV=3                              | sp P26641 EF1G_HU | 50 kDa  | 60% | 70%  | 69%  | 100% |      |      |      |
| Inosine-5'-monophosphate dehydrogenase 2 OS=Homo sapiens GN=IMPDH2 PE=1 SV=2              | sp P12268 IMDH2_H | 56 kDa  | 99% | 100% | 100% |      |      |      |      |
| Nodal modulator 1 OS=Homo sapiens GN=NOMO1 PE=1 SV=5                                      | sp Q15155 NOMO1_H | 134 kDa |     | 24%  | 69%  | 100% |      |      | 100% |
| Plasminogen activator inhibitor 1 RNA-binding protein OS=Homo sapiens GN=SERBP1 PE=1 SV=2 | sp Q8NC51 PAIRB_H | 45 kDa  | 68% | 100% | 100% |      |      |      |      |
| Adenylosuccinate lyase OS=Homo sapiens GN=ADSL PE=1 SV=2                                  | sp P30566 PUR8_HU | 55 kDa  | 68% | 100% | 100% |      |      |      |      |
| Septin-8 OS=Homo sapiens GN=SEPT8 PE=1 SV=4                                               | sp Q92599 SEPT8_H | 56 kDa  |     | 100% | 100% |      |      |      |      |
| X-ray repair cross-complementing protein 6 OS=Homo sapiens GN=XRCC6 PE=1 SV=2             | sp P12956 XRCC6_H | 70 kDa  |     |      |      |      | 100% |      | 100% |
| Matrin-3 OS=Homo sapiens GN=MATR3 PE=1 SV=2                                               | sp P43243 MATR3_H | 95 kDa  |     |      |      |      | 74%  |      | 100% |
| SPRY domain-containing protein 4 OS=Homo sapiens GN=SPRYD4 PE=1 SV=2                      | sp Q8WW59 SPRY4_H | 23 kDa  |     |      |      | 58%  |      | 100% |      |
| U5 small nuclear ribonucleoprotein 200 kDa helicase OS=Homo sapiens GN=SNRNP200 PE=1 SV=2 | sp O75643 U520_HU | 245 kDa |     |      |      |      |      |      | 100% |
| Electron transfer flavoprotein subunit beta OS=Homo sapiens GN=ETFB PE=1 SV=3             | sp P38117 ETFB_HU | 28 kDa  |     |      |      |      | 100% |      |      |
| Peroxiredoxin-1 OS=Homo sapiens GN=PRDX1 PE=1 SV=1                                        | sp Q06830 PRDX1_H | 22 kDa  |     | 55%  | 69%  |      | 67%  | 74%  | 100% |



|                                                                                                  |                   |         |      |      |      |           |          |
|--------------------------------------------------------------------------------------------------|-------------------|---------|------|------|------|-----------|----------|
| HLA class I histocompatibility antigen, A-1 alpha chain<br>OS=Homo sapiens GN=HLA-A<br>PE=1 SV=1 | sp P30443 1A01_HU | 41 kDa  | 70%  | 100% | 100% | 74%       |          |
| ATP-dependent RNA helicase<br>DDX39A OS=Homo sapiens<br>GN=DDX39A PE=1 SV=2                      | sp O00148 DX39A_H | 49 kDa  |      | 69%  | 100% |           | 100% 73% |
| Neutral alpha-glucosidase AB<br>OS=Homo sapiens<br>GN=GANAB PE=1 SV=3                            | sp Q14697 GANAB_H | 107 kDa | 98%  | 70%  | 100% |           | 73%      |
| Alpha-actinin-1 OS=Homo sapiens<br>GN=ACTN1 PE=1 SV=2                                            | sp P12814 ACTN1_H | 103 kDa | 68%  |      | 69%  |           | 79% 100% |
| Carnitine O-palmitoyltransferase 1, liver isoform<br>OS=Homo sapiens<br>GN=CPT1A PE=1 SV=2       | sp P50416 CPT1A_H | 88 kDa  |      | 100% | 100% | 100%      |          |
| Lysosomal protective protein<br>OS=Homo sapiens GN=CTSA<br>PE=1 SV=2                             | sp P10619 PPGB_HU | 54 kDa  | 100% | 70%  | 100% |           |          |
| Pyruvate kinase isozymes M1/M2<br>OS=Homo sapiens<br>GN=PKM PE=1 SV=4                            | sp P14618 KPYM_H  | 58 kDa  |      |      | 69%  | 100%      | 100%     |
| Serine hydroxymethyltransferase, cytosolic<br>OS=Homo sapiens<br>GN=SHMT1 PE=1 SV=1              | sp P34896 GLYC_H  | 53 kDa  | 100% | 100% | 69%  |           |          |
| Rho GTPase-activating protein 1<br>OS=Homo sapiens<br>GN=ARHGAP1 PE=1 SV=1                       | sp Q07960 RHG01_H | 50 kDa  | 68%  | 100% | 100% |           |          |
| Basigin<br>OS=Homo sapiens<br>GN=BSG PE=1 SV=2                                                   | sp P35613 BASI_HU | 42 kDa  |      |      | 69%  | 95%       | 100%     |
| L-lactate dehydrogenase A-like 6A<br>OS=Homo sapiens<br>GN=LDHAL6A PE=2 SV=1                     | sp Q6ZMR3 LDH6A_H | 37 kDa  |      |      |      | 100% 100% | 16%      |
| Heat shock protein HSP 90-alpha<br>OS=Homo sapiens<br>GN=HSP90AA1 PE=1 SV=5                      | sp P07900 HS90A_H | 85 kDa  |      |      | 100% |           | 100%     |
| Myoferlin<br>OS=Homo sapiens<br>GN=MYOF PE=1 SV=1                                                | sp Q9NZM1 MYOF_H  | 235 kDa |      |      | 100% |           | 100%     |

|                                                                                   |                   |         |      |      |     |      |            |
|-----------------------------------------------------------------------------------|-------------------|---------|------|------|-----|------|------------|
| 2-oxoglutarate dehydrogenase, mitochondrial OS=Homo sapiens GN=OGDH PE=1 SV=3     | sp Q02218 ODO1_H  | 116 kDa | 100% | 100% |     |      |            |
| Elongation factor Tu, mitochondrial OS=Homo sapiens GN=TUFM PE=1 SV=2             | sp P49411 EFTU_HU | 50 kDa  |      | 100% |     | 74%  |            |
| Guanine nucleotide-binding protein-like 3 OS=Homo sapiens GN=GNL3 PE=1 SV=2       | sp Q9BVP2 GNL3_H  | 62 kDa  |      | 69%  |     |      | 100%       |
| L-lactate dehydrogenase B chain OS=Homo sapiens GN=LDHB PE=1 SV=2                 | sp P07195 LDHB_H  | 37 kDa  | 100% |      | 29% | 17%  |            |
| Flotillin-1 OS=Homo sapiens GN=FLOT1 PE=1 SV=3                                    | sp O75955 FLOT1_H | 47 kDa  |      | 100% |     |      |            |
| Ornithine aminotransferase, mitochondrial OS=Homo sapiens GN=OAT PE=1 SV=1        | sp P04181 OAT_HU  | 49 kDa  |      | 100% |     |      |            |
| Zinc finger CCCH domain-containing protein 14 OS=Homo sapiens GN=ZC3H14 PE=1 SV=1 | sp Q6PJT7 ZC3HE_H | 83 kDa  |      | 100% |     |      |            |
| Elongation factor G, mitochondrial OS=Homo sapiens GN=GFM1 PE=1 SV=2              | sp Q96RP9 EFGM_H  | 83 kDa  |      | 100% |     |      |            |
| Structural maintenance of chromosomes protein 3 OS=Homo sapiens GN=SMC3 PE=1 SV=2 | sp Q9UQE7 SMC3_H  | 142 kDa |      | 100% |     |      |            |
| Guanine deaminase OS=Homo sapiens GN=GDA PE=1 SV=1                                | sp Q9Y2T3 GUAD_H  | 51 kDa  |      | 100% |     |      |            |
| DNA polymerase alpha subunit B OS=Homo sapiens GN=POLA2 PE=1 SV=2                 | sp Q14181 DPOA2_H | 66 kDa  |      |      |     |      | 100%       |
| Heterogeneous nuclear ribonucleoprotein L OS=Homo sapiens GN=HNRNPL PE=1 SV=2     | sp P14866 HNRPL_H | 64 kDa  |      |      | 97% | 100% | 67%<br>73% |

|                                                                                                  |                   |         |     |      |      |      |      |      |
|--------------------------------------------------------------------------------------------------|-------------------|---------|-----|------|------|------|------|------|
| Lon protease homolog,<br>mitochondrial OS=Homo<br>sapiens GN=LONP1 PE=1<br>SV=2                  | sp P36776 LONM_H  | 106 kDa | 68% | 70%  | 100% | 80%  |      |      |
| Dermcidin OS=Homo sapiens<br>GN=DCD PE=1 SV=2                                                    | sp P81605 DCD_HU  | 11 kDa  |     | 70%  | 69%  |      | 40%  | 100% |
| Ankyrin repeat and MYND<br>domain-containing protein 2<br>OS=Homo sapiens<br>GN=ANKMY2 PE=1 SV=1 | sp Q8IV38 ANKY2_  | 49 kDa  | 99% | 100% | 69%  |      |      |      |
| Nuclear pore membrane<br>glycoprotein 210 OS=Homo<br>sapiens GN=NUP210 PE=1<br>SV=3              | sp Q8TEM1 PO210_  | 205 kDa | 68% |      | 100% | 100% |      |      |
| Exosome component 10<br>OS=Homo sapiens<br>GN=EXOSC10 PE=1 SV=2                                  | sp Q01780 EXOSX_  | 101 kDa | 38% | 100% | 69%  |      |      |      |
| Protein disulfide-isomerase A4<br>OS=Homo sapiens GN=PDIA4<br>PE=1 SV=2                          | sp P13667 PDIA4_H | 73 kDa  |     |      |      |      | 100% | 100% |
| Metaxin-3 OS=Homo sapiens<br>GN=MTX3 PE=1 SV=2                                                   | sp Q5HYI7 MTX3_I  | 35 kDa  |     |      |      |      | 100% |      |
| Ribose-5-phosphate isomerase<br>OS=Homo sapiens GN=RPIA<br>PE=1 SV=3                             | sp P49247 RPIA_HU | 33 kDa  |     |      |      |      | 98%  | 100% |
| Ribonucleoside-diphosphate<br>reductase large subunit<br>OS=Homo sapiens GN=RRM1<br>PE=1 SV=1    | sp P23921 RIR1_HU | 90 kDa  |     | 100% | 69%  |      |      |      |
| DBIRD complex subunit<br>ZNF326 OS=Homo sapiens<br>GN=ZNF326 PE=1 SV=2                           | sp Q5BKZ1 ZN326_  | 66 kDa  |     |      |      |      |      | 100% |
| TAR DNA-binding protein 43<br>OS=Homo sapiens<br>GN=TARDBP PE=1 SV=1                             | sp Q13148 TADBP_  | 45 kDa  |     |      |      | 100% |      |      |
| Galectin-3-binding protein<br>OS=Homo sapiens<br>GN=LGALS3BP PE=1 SV=1                           | sp Q08380 LG3BP_I | 65 kDa  |     |      |      |      |      | 100% |
| 40S ribosomal protein S7<br>OS=Homo sapiens GN=RPS7<br>PE=1 SV=1                                 | sp P62081 RS7_HUM | 22 kDa  |     |      |      |      |      | 100% |

|                                                                                                                                                    |                   |         |      |      |      |      |      |      |      |
|----------------------------------------------------------------------------------------------------------------------------------------------------|-------------------|---------|------|------|------|------|------|------|------|
| Peroxiredoxin-2 OS=Homo sapiens GN=PRDX2 PE=1 SV=5                                                                                                 | sp P32119 PRDX2_H | 22 kDa  |      |      |      |      |      |      | 100% |
| Protein Hikeshi OS=Homo sapiens GN=C11orf73 PE=1 SV=2                                                                                              | sp Q53FT3 HIKES_H | 22 kDa  |      |      |      |      |      |      | 100% |
| 26S proteasome non-ATPase regulatory subunit 8 OS=Homo sapiens GN=PSMD8 PE=1 SV=2                                                                  | sp P48556 PSMD8_H | 40 kDa  |      |      |      |      |      | 100% |      |
| Serine/arginine-rich splicing factor 6 OS=Homo sapiens GN=SRSF6 PE=1 SV=2                                                                          | sp Q13247 SRSF6_H | 40 kDa  |      | 100% |      |      |      |      |      |
| Histone H2B type 1-C/E/F/G/I OS=Homo sapiens GN=HIST1H2BC PE=1 SV=4                                                                                | sp P62807 H2B1C_H | 14 kDa  |      |      | 98%  | 100% |      | 74%  |      |
| Dihydrolipoyllysine-residue succinyltransferase component of 2-oxoglutarate dehydrogenase complex, mitochondrial OS=Homo sapiens GN=DLST PE=1 SV=4 | sp P36957 ODO2_H  | 49 kDa  |      | 100% | 100% | 70%  |      |      |      |
| Keratin, type II cytoskeletal 3 OS=Homo sapiens GN=KRT3 PE=1 SV=3                                                                                  | sp P12035 K2C3_HU | 64 kDa  |      | 70%  | 100% |      |      | 100% |      |
| tRNA (cytosine(34)-C(5))-methyltransferase OS=Homo sapiens GN=NSUN2 PE=1 SV=2                                                                      | sp Q08J23 NSUN2_H | 86 kDa  | 68%  | 100% | 100% |      |      |      |      |
| Tubulin alpha-1B chain OS=Homo sapiens GN=TUBA1B PE=1 SV=1                                                                                         | sp P68363 TBA1B_H | 50 kDa  |      | 70%  |      |      |      | 79%  | 100% |
| Filamin-B OS=Homo sapiens GN=FLNB PE=1 SV=2                                                                                                        | sp O75369 FLNB_H  | 278 kDa |      | 70%  | 100% |      |      |      | 73%  |
| Septin-6 OS=Homo sapiens GN=SEPT6 PE=1 SV=4                                                                                                        | sp Q14141 SEPT6_H | 50 kDa  | 100% | 100% |      |      |      |      |      |
| 2,4-dienoyl-CoA reductase, mitochondrial OS=Homo sapiens GN=DECR1 PE=1 SV=1                                                                        | sp Q16698 DECR_H  | 36 kDa  |      |      |      | 100% | 100% |      |      |

|                                                                                  |                   |         |      |     |      |      |      |
|----------------------------------------------------------------------------------|-------------------|---------|------|-----|------|------|------|
| Programmed cell death protein 10 OS=Homo sapiens GN=PDCD10 PE=1 SV=1             | sp Q9BUL8 PDC10_  | 25 kDa  |      |     | 100% | 100% |      |
| Proteasome subunit alpha type-2 OS=Homo sapiens GN=PSMA2 PE=1 SV=2               | sp P25787 PSA2_HU | 26 kDa  |      |     |      | 100% | 77%  |
| Programmed cell death 6-interacting protein OS=Homo sapiens GN=PDCD6IP PE=1 SV=1 | sp Q8WUM4 PDC6I   | 96 kDa  | 100% |     |      | 74%  |      |
| Mitochondrial import receptor subunit TOM34 OS=Homo sapiens GN=TOMM34 PE=1 SV=2  | sp Q15785 TOM34_  | 35 kDa  |      |     | 68%  | 100% |      |
| Mammalian ependymin-related protein 1 OS=Homo sapiens GN=EPDR1 PE=1 SV=2         | sp Q9UM22 EPDR1_  | 25 kDa  |      |     |      | 100% | 62%  |
| Nuclear RNA export factor 1 OS=Homo sapiens GN=NXF1 PE=1 SV=1                    | sp Q9UBU9 NXF1_   | 70 kDa  | 45%  | 12% |      |      | 100% |
| Putative heat shock protein HSP90-beta 2 OS=Homo sapiens GN=HSP90AB2P PE=1 SV=2  | sp Q58FF8 H90B2_  | 44 kDa  |      |     | 13%  | 35%  | 100% |
| SWI/SNF complex subunit SMARCC1 OS=Homo sapiens GN=SMARCC1 PE=1 SV=3             | sp Q92922 SMRC1_  | 123 kDa |      |     |      |      | 100% |
| 39S ribosomal protein L15, mitochondrial OS=Homo sapiens GN=MRPL15 PE=1 SV=1     | sp Q9P015 RM15_H  | 33 kDa  |      |     |      | 100% |      |
| Adenine phosphoribosyltransferase OS=Homo sapiens GN=APRT PE=1 SV=2              | sp P07741 APT_HU  | 20 kDa  |      |     |      |      | 100% |
| Transcription intermediary factor 1-beta OS=Homo sapiens GN=TRIM28 PE=1 SV=5     | sp Q13263 TIF1B_H | 89 kDa  |      |     |      |      | 100% |

|                                                                                                    |                   |        |      |      |      |      |      |         |
|----------------------------------------------------------------------------------------------------|-------------------|--------|------|------|------|------|------|---------|
| DnaJ homolog subfamily A member 3, mitochondrial<br>OS=Homo sapiens<br>GN=DNAJA3 PE=1 SV=2         | sp Q96EY1 DNJA3   | 52 kDa |      | 100% |      |      |      |         |
| 5-formyltetrahydrofolate cyclo-<br>ligase OS=Homo sapiens<br>GN=MTHFS PE=1 SV=2                    | sp P49914 MTHFS_  | 23 kDa |      |      |      | 100% |      |         |
| Protein disulfide-isomerase A6<br>OS=Homo sapiens GN=PDIA6<br>PE=1 SV=1                            | sp Q15084 PDIA6_H | 48 kDa |      | 80%  |      |      | 79%  | 100%    |
| Large neutral amino acids<br>transporter small subunit 1<br>OS=Homo sapiens<br>GN=SLC7A5 PE=1 SV=2 | sp Q01650 LAT1_HU | 55 kDa | 69%  | 100% |      |      |      | 73%     |
| Transmembrane protein 109<br>OS=Homo sapiens<br>GN=TMEM109 PE=1 SV=1                               | sp Q9BVC6 TM109   | 26 kDa | 69%  |      |      |      | 100% | 73%     |
| Polyadenylate-binding protein 1<br>OS=Homo sapiens<br>GN=PABPC1 PE=1 SV=2                          | sp P11940 PABP1_H | 71 kDa |      |      |      | 100% |      | 88% 49% |
| Sideroflexin-1 OS=Homo<br>sapiens GN=SFXN1 PE=1<br>SV=4                                            | sp Q9H9B4 SFXN1   | 36 kDa |      |      | 100% | 100% |      |         |
| Fructose-bisphosphate aldolase<br>A OS=Homo sapiens<br>GN=ALDOA PE=1 SV=2                          | sp P04075 ALDOA   | 39 kDa |      |      |      | 99%  | 100% |         |
| Inosine-5'-monophosphate<br>dehydrogenase 1 OS=Homo<br>sapiens GN=IMPDH1 PE=1<br>SV=2              | sp P20839 IMDH1_H | 55 kDa | 100% | 98%  |      |      |      |         |
| Heterogeneous nuclear<br>ribonucleoproteins C1/C2<br>OS=Homo sapiens<br>GN=HNRNPC PE=1 SV=4        | sp P07910 HNRPC_  | 34 kDa |      |      |      | 100% |      | 79% 18% |
| Enoyl-CoA hydratase,<br>mitochondrial OS=Homo<br>sapiens GN=ECHS1 PE=1<br>SV=4                     | sp P30084 ECHM_H  | 31 kDa |      |      |      | 100% |      | 79%     |
| Thioredoxin reductase 1,<br>cytoplasmic OS=Homo sapiens<br>GN=TXNRD1 PE=1 SV=3                     | sp Q16881 TRXR1_  | 71 kDa |      | 70%  | 100% |      |      |         |

|                                                                                                   |                    |         |      |      |      |      |
|---------------------------------------------------------------------------------------------------|--------------------|---------|------|------|------|------|
| Keratin, type II cytoskeletal 78<br>OS=Homo sapiens GN=KRT78<br>PE=2 SV=2                         | sp Q8N1N4 K2C78_   | 57 kDa  |      | 70%  |      | 100% |
| Beta-arrestin-1 OS=Homo<br>sapiens GN=ARRB1 PE=1<br>SV=2                                          | sp P49407 ARRB1_1  | 47 kDa  | 100% | 70%  |      |      |
| Probable ATP-dependent RNA<br>helicase DDX46 OS=Homo<br>sapiens GN=DDX46 PE=1<br>SV=2             | sp Q7L014 DDX46_1  | 117 kDa | 100% | 70%  |      |      |
| Keratin, type II cytoskeletal 1b<br>OS=Homo sapiens GN=KRT77<br>PE=2 SV=3                         | sp Q7Z794 K2C1B_1  | 62 kDa  |      |      | 69%  | 100% |
| Inhibitor of growth protein 3<br>OS=Homo sapiens GN=ING3<br>PE=1 SV=2                             | sp Q9NXR8 ING3_H1  | 47 kDa  |      | 100% | 69%  |      |
| Peptidyl-prolyl cis-trans<br>isomerase FKBP5 OS=Homo<br>sapiens GN=FKBP5 PE=1<br>SV=2             | sp Q13451 FKBP5_1  | 51 kDa  |      | 65%  | 100% |      |
| Cell division cycle 5-like<br>protein OS=Homo sapiens<br>GN=CDC5L PE=1 SV=2                       | sp Q99459 CDC5L_1  | 92 kDa  | 100% | 32%  |      |      |
| Glutathione S-transferase P<br>OS=Homo sapiens GN=GSTP1<br>PE=1 SV=2                              | sp P09211 GSTP1_H1 | 23 kDa  |      |      |      | 100% |
| Cysteine and glycine-rich<br>protein 1 OS=Homo sapiens<br>GN=CSRP1 PE=1 SV=3                      | sp P21291 CSRP1_H1 | 21 kDa  |      |      |      | 100% |
| Exosome complex component<br>RRP4 OS=Homo sapiens<br>GN=EXOSC2 PE=1 SV=2                          | sp Q13868 EXOS2_1  | 33 kDa  |      |      | 100% |      |
| 116 kDa U5 small nuclear<br>ribonucleoprotein component<br>OS=Homo sapiens<br>GN=EFTUD2 PE=1 SV=1 | sp Q15029 U5S1_HU  | 109 kDa |      |      | 100% |      |
| Keratin, type I cuticular Ha1<br>OS=Homo sapiens GN=KRT31<br>PE=2 SV=3                            | sp Q15323 K1H1_H1  | 47 kDa  |      |      |      | 100% |

|                                                                                              |                   |         |      |      |
|----------------------------------------------------------------------------------------------|-------------------|---------|------|------|
| Vacuolar protein sorting-associated protein 37A<br>OS=Homo sapiens<br>GN=VPS37A PE=1 SV=1    | sp Q8NEZ2 VP37A_  | 44 kDa  | 100% |      |
| G patch domain and KOW motifs-containing protein<br>OS=Homo sapiens<br>GN=GPKOW PE=1 SV=2    | sp Q92917 GPKOW_  | 52 kDa  | 100% |      |
| Cell division cycle-associated 7-like protein<br>OS=Homo sapiens<br>GN=CDCA7L PE=1 SV=2      | sp Q96GN5 CDA7L_  | 52 kDa  |      | 100% |
| RuvB-like 2<br>OS=Homo sapiens<br>GN=RUVBL2 PE=1 SV=3                                        | sp Q9Y230 RUVB2_  | 51 kDa  | 100% |      |
| Plasma alpha-L-fucosidase<br>OS=Homo sapiens<br>GN=FUCA2 PE=1 SV=2                           | sp Q9BTY2 FUCO2_  | 54 kDa  | 100% |      |
| Sideroflexin-3<br>OS=Homo sapiens<br>GN=SFXN3 PE=1 SV=2                                      | sp Q9BWM7 SFXN3_  | 36 kDa  |      | 100% |
| DNA mismatch repair protein Msh2<br>OS=Homo sapiens<br>GN=MSH2 PE=1 SV=1                     | sp P43246 MSH2_H_ | 105 kDa | 100% |      |
| Ribosome biogenesis protein WDR12<br>OS=Homo sapiens<br>GN=WDR12 PE=1 SV=2                   | sp Q9GZL7 WDR12_  | 48 kDa  | 100% |      |
| Dihydropteridine reductase<br>OS=Homo sapiens<br>GN=QDPR PE=1 SV=2                           | sp P09417 DHPR_H_ | 26 kDa  |      | 100% |
| Leucine-rich repeat-containing protein 47<br>OS=Homo sapiens<br>GN=LRR47 PE=1 SV=1           | sp Q8N1G4 LRC47_  | 63 kDa  |      | 100% |
| Serine--tRNA ligase, mitochondrial<br>OS=Homo sapiens<br>GN=SARS2 PE=1 SV=1                  | sp Q9NP81 SYSM_F_ | 58 kDa  | 100% |      |
| Translation initiation factor eIF-2B subunit gamma<br>OS=Homo sapiens<br>GN=EIF2B3 PE=1 SV=1 | sp Q9NR50 EI2BG_  | 50 kDa  | 100% |      |



|                                                                                                            |                   |         |      |      |      |      |
|------------------------------------------------------------------------------------------------------------|-------------------|---------|------|------|------|------|
| Thiosulfate sulfurtransferase<br>OS=Homo sapiens GN=TST<br>PE=1 SV=4                                       | sp Q16762 THTR_H  | 33 kDa  |      |      | 100% |      |
| Dynactin subunit 3 OS=Homo<br>sapiens GN=DCTN3 PE=1<br>SV=1                                                | sp O75935 DCTN3_  | 21 kDa  |      |      |      | 100% |
| Protein S100-A4 OS=Homo<br>sapiens GN=S100A4 PE=1<br>SV=1                                                  | sp P26447 S10A4_H | 12 kDa  |      |      |      | 100% |
| 4F2 cell-surface antigen heavy<br>chain OS=Homo sapiens<br>GN=SLC3A2 PE=1 SV=3                             | sp P08195 4F2_HUM | 68 kDa  |      |      |      | 100% |
| Double-stranded RNA-specific<br>adenosine deaminase<br>OS=Homo sapiens GN=ADAR<br>PE=1 SV=4                | sp P55265 DSRAD_  | 136 kDa | 100% |      |      |      |
| Ferritin heavy chain OS=Homo<br>sapiens GN=FTH1 PE=1 SV=2                                                  | sp P02794 FRIH_HU | 21 kDa  |      |      |      | 100% |
| Exosome complex component<br>RRP46 OS=Homo sapiens<br>GN=EXOSC5 PE=1 SV=1                                  | sp Q9NQT4 EXOS5_  | 25 kDa  |      |      | 100% |      |
| Pre-mRNA 3'-end-processing<br>factor FIP1 OS=Homo sapiens<br>GN=FIP1L1 PE=1 SV=1                           | sp Q6UN15 FIP1_HU | 67 kDa  |      |      |      | 100% |
| Pyruvate dehydrogenase E1<br>component subunit beta,<br>mitochondrial OS=Homo<br>sapiens GN=PDHB PE=1 SV=3 | sp P11177 ODPB_HU | 39 kDa  |      |      |      | 100% |
| Interleukin enhancer-binding<br>factor 2 OS=Homo sapiens<br>GN=ILF2 PE=1 SV=2                              | sp Q12905 ILF2_HU | 43 kDa  |      | 100% |      |      |
| Procollagen-lysine,2-<br>oxoglutarate 5-dioxygenase 3<br>OS=Homo sapiens GN=PLOD3<br>PE=1 SV=1             | sp O60568 PLOD3_I | 85 kDa  | 100% | 80%  |      |      |
| RNA-binding motif protein, X<br>chromosome OS=Homo sapiens<br>GN=RBMX PE=1 SV=3                            | sp P38159 RBMX_H  | 42 kDa  |      | 80%  |      | 100% |

|                                                                                                                 |                   |         |     |      |      |      |      |
|-----------------------------------------------------------------------------------------------------------------|-------------------|---------|-----|------|------|------|------|
| Fumarate hydratase, mitochondrial OS=Homo sapiens GN=FH PE=1 SV=3                                               | sp P07954 FUMH_H  | 55 kDa  |     |      | 100% | 74%  |      |
| Poly(U)-binding-splicing factor PUF60 OS=Homo sapiens GN=PUF60 PE=1 SV=1                                        | sp Q9UHX1 PUF60   | 60 kDa  |     |      | 100% |      | 73%  |
| Putative eukaryotic translation initiation factor 2 subunit 3-like protein OS=Homo sapiens GN=EIF2S3L PE=5 SV=2 | sp Q2VIR3 IF2GL_H | 51 kDa  | 70% | 100% |      |      |      |
| Torsin-1A-interacting protein 1 OS=Homo sapiens GN=TOR1AIP1 PE=1 SV=2                                           | sp Q5JTV8 TOIP1_H | 66 kDa  |     |      |      | 69%  | 100% |
| Serine/threonine-protein phosphatase PGAM5, mitochondrial OS=Homo sapiens GN=PGAM5 PE=1 SV=2                    | sp Q96HS1 PGAM5   | 32 kDa  |     |      | 100% | 67%  |      |
| Regulator of chromosome condensation OS=Homo sapiens GN=RCC1 PE=1 SV=1                                          | sp P18754 RCC1_HU | 45 kDa  |     |      | 100% |      | 66%  |
| Tyrosine-protein kinase Fyn OS=Homo sapiens GN=FYN PE=1 SV=3                                                    | sp P06241 FYN_HU  | 61 kDa  | 65% | 100% |      |      |      |
| RNA-binding protein 10 OS=Homo sapiens GN=RBM10 PE=1 SV=3                                                       | sp P98175 RBM10_H | 104 kDa |     |      |      | 36%  | 100% |
| Nucleolar RNA helicase 2 OS=Homo sapiens GN=DDX21 PE=1 SV=5                                                     | sp Q9NR30 DDX21   | 87 kDa  |     | 17%  | 100% |      |      |
| Beta-galactosidase OS=Homo sapiens GN=GLB1 PE=1 SV=2                                                            | sp P16278 BGAL_H  | 76 kDa  |     |      |      |      | 100% |
| Cytochrome b-c1 complex subunit 2, mitochondrial OS=Homo sapiens GN=UQCRC2 PE=1 SV=3                            | sp P22695 QCR2_HU | 48 kDa  |     |      |      | 100% |      |

|                                                                                                                                |                   |        |      |      |      |
|--------------------------------------------------------------------------------------------------------------------------------|-------------------|--------|------|------|------|
| ES1 protein homolog,<br>mitochondrial OS=Homo<br>sapiens GN=C21orf33 PE=1<br>SV=3                                              | sp P30042 ES1_HUN | 28 kDa |      | 100% |      |
| ATP synthase subunit gamma,<br>mitochondrial OS=Homo<br>sapiens GN=ATP5C1 PE=1<br>SV=1                                         | sp P36542 ATPG_HU | 33 kDa |      | 100% |      |
| Dolichyl-<br>diphosphooligosaccharide--<br>protein glycosyltransferase 48<br>kDa subunit OS=Homo sapiens<br>GN=DDOST PE=1 SV=4 | sp P39656 OST48_H | 51 kDa | 100% |      |      |
| Malate dehydrogenase,<br>cytoplasmic OS=Homo sapiens<br>GN=MDH1 PE=1 SV=4                                                      | sp P40925 MDHC_H  | 36 kDa |      | 100% |      |
| Proteasome subunit beta type-3<br>OS=Homo sapiens GN=PSMB3<br>PE=1 SV=2                                                        | sp P49720 PSB3_HU | 23 kDa |      |      | 100% |
| Peroxisomal multifunctional<br>enzyme type 2 OS=Homo<br>sapiens GN=HSD17B4 PE=1<br>SV=3                                        | sp P51659 DHB4_H  | 80 kDa |      | 100% |      |
| Serine/arginine-rich splicing<br>factor 3 OS=Homo sapiens<br>GN=SRSF3 PE=1 SV=1                                                | sp P84103 SRSF3_H | 19 kDa |      |      | 100% |
| Serine/arginine-rich splicing<br>factor 4 OS=Homo sapiens<br>GN=SRSF4 PE=1 SV=2                                                | sp Q08170 SRSF4_H | 57 kDa | 100% |      |      |
| Cytoplasmic dynein 1<br>intermediate chain 2 OS=Homo<br>sapiens GN=DYNC112 PE=1<br>SV=3                                        | sp Q13409 DC112_H | 71 kDa |      |      | 100% |
| Rab-like protein 3 OS=Homo<br>sapiens GN=RABL3 PE=1<br>SV=1                                                                    | sp Q5HYI8 RABL3_  | 26 kDa |      | 100% |      |
| Calponin-2 OS=Homo sapiens<br>GN=CNN2 PE=1 SV=4                                                                                | sp Q99439 CNN2_H  | 34 kDa |      | 100% |      |

|                                                                                             |                   |        |      |      |      |
|---------------------------------------------------------------------------------------------|-------------------|--------|------|------|------|
| COMM domain-containing protein 3 OS=Homo sapiens GN=COMMD3 PE=1 SV=1                        | sp Q9UBI1 COMD3   | 22 kDa |      | 100% |      |
| Ubiquilin-2 OS=Homo sapiens GN=UBQLN2 PE=1 SV=2                                             | sp Q9UHD9 UBQL2   | 66 kDa |      |      | 100% |
| Proliferation-associated protein 2G4 OS=Homo sapiens GN=PA2G4 PE=1 SV=3                     | sp Q9UQ80 PA2G4   | 44 kDa | 100% |      |      |
| Protein S100-A11 OS=Homo sapiens GN=S100A11 PE=1 SV=2                                       | sp P31949 S10AB_H | 12 kDa |      |      | 100% |
| Wiskott-Aldrich syndrome protein family member 2 OS=Homo sapiens GN=WASF2 PE=1 SV=3         | sp Q9Y6W5 WASF2   | 54 kDa |      |      | 100% |
| Protein regulator of cytokinesis 1 OS=Homo sapiens GN=PRC1 PE=1 SV=2                        | sp O43663 PRC1_HU | 72 kDa |      |      | 100% |
| BH3-interacting domain death agonist OS=Homo sapiens GN=BID PE=1 SV=1                       | sp P55957 BID_HUM | 22 kDa |      | 100% |      |
| Mitochondrial carrier homolog 2 OS=Homo sapiens GN=MTCH2 PE=1 SV=1                          | sp Q9Y6C9 MTCH2   | 33 kDa |      | 100% |      |
| Sorting nexin-2 OS=Homo sapiens GN=SNX2 PE=1 SV=2                                           | sp O60749 SNX2_H  | 58 kDa |      |      | 100% |
| Eukaryotic translation initiation factor 2 subunit 2 OS=Homo sapiens GN=EIF2S2 PE=1 SV=2    | sp P20042 IF2B_HU | 38 kDa | 100% |      |      |
| Proteasome subunit alpha type-7 OS=Homo sapiens GN=PSMA7 PE=1 SV=1                          | sp O14818 PSA7_HU | 28 kDa |      | 100% |      |
| Calcium-binding mitochondrial carrier protein SCaMC-1 OS=Homo sapiens GN=SLC25A24 PE=1 SV=2 | sp Q6NUK1 SCMC1   | 53 kDa | 100% |      |      |

|                                                                                                          |                   |         |      |      |      |
|----------------------------------------------------------------------------------------------------------|-------------------|---------|------|------|------|
| Receptor-type tyrosine-protein phosphatase F OS=Homo sapiens GN=PTPRF PE=1 SV=2                          | sp P10586 PTPRF_H | 213 kDa |      |      | 100% |
| Transmembrane emp24 domain-containing protein 2 OS=Homo sapiens GN=TMED2 PE=1 SV=1                       | sp Q15363 TMED2   | 23 kDa  |      |      | 100% |
| Alanine--tRNA ligase, cytoplasmic OS=Homo sapiens GN=AARS PE=1 SV=2                                      | sp P49588 SYAC_H  | 107 kDa | 100% |      |      |
| THO complex subunit 7 homolog OS=Homo sapiens GN=THOC7 PE=1 SV=3                                         | sp Q619Y2 THOC7   | 24 kDa  |      |      | 100% |
| Probable RNA-binding protein 23 OS=Homo sapiens GN=RBM23 PE=1 SV=1                                       | sp Q86U06 RBM23   | 49 kDa  |      |      | 100% |
| Tripeptidyl-peptidase 1 OS=Homo sapiens GN=TPP1 PE=1 SV=2                                                | sp O14773 TPP1_H  | 61 kDa  | 100% |      |      |
| Protein phosphatase 1 regulatory subunit 12A OS=Homo sapiens GN=PPP1R12A PE=1 SV=1                       | sp O14974 MYPT1   | 115 kDa |      |      | 100% |
| Gamma-glutamylcyclotransferase OS=Homo sapiens GN=GGCT PE=1 SV=1                                         | sp O75223 GGCT_H  | 21 kDa  |      | 100% |      |
| NADH dehydrogenase [ubiquinone] iron-sulfur protein 2, mitochondrial OS=Homo sapiens GN=NDUFS2 PE=1 SV=2 | sp O75306 NDUS2   | 53 kDa  | 100% |      |      |
| Pre-mRNA-processing factor 40 homolog A OS=Homo sapiens GN=PRPF40A PE=1 SV=2                             | sp O75400 PR40A_H | 109 kDa |      |      | 100% |
| Heat shock 70 kDa protein 4L OS=Homo sapiens GN=HSPA4L PE=1 SV=3                                         | sp O95757 HS74L_H | 95 kDa  |      |      | 100% |

|                                                                                                                                            |                    |        |      |      |      |
|--------------------------------------------------------------------------------------------------------------------------------------------|--------------------|--------|------|------|------|
| Cytochrome c oxidase subunit 2<br>OS=Homo sapiens GN=MT-CO2 PE=1 SV=1                                                                      | sp P00403 COX2_HU  | 26 kDa |      |      | 100% |
| Salivary acidic proline-rich phosphoprotein 1/2 OS=Homo sapiens GN=PRH1 PE=1 SV=2                                                          | sp P02810 PRPC_HU  | 17 kDa |      |      | 100% |
| Heat shock protein beta-1 OS=Homo sapiens GN=HSPB1 PE=1 SV=2                                                                               | sp P04792 HSPB1_HU | 23 kDa |      | 100% |      |
| Glucose-6-phosphate isomerase OS=Homo sapiens GN=GPI PE=1 SV=4                                                                             | sp P06744 G6PI_HU  | 63 kDa |      | 100% |      |
| Dihydrolipoyllysine-residue acetyltransferase component of pyruvate dehydrogenase complex, mitochondrial OS=Homo sapiens GN=DLAT PE=1 SV=3 | sp P10515 ODP2_HU  | 69 kDa |      |      | 100% |
| Bifunctional methylenetetrahydrofolate dehydrogenase/cyclohydrolase, mitochondrial OS=Homo sapiens GN=MTHFD2 PE=1 SV=2                     | sp P13995 MTDC_HU  | 38 kDa |      | 100% |      |
| Zinc finger protein RFP OS=Homo sapiens GN=TRIM27 PE=1 SV=1                                                                                | sp P14373 TRI27_HU | 58 kDa | 100% |      |      |
| Small nuclear ribonucleoprotein-associated proteins B and B' OS=Homo sapiens GN=SNRNPB PE=1 SV=2                                           | sp P14678 RSMB_HU  | 25 kDa |      | 100% |      |
| V-type proton ATPase subunit B, kidney isoform OS=Homo sapiens GN=ATP6V1B1 PE=1 SV=3                                                       | sp P15313 VATB1_HU | 57 kDa | 100% |      |      |
| 60S ribosomal protein L17 OS=Homo sapiens GN=RPL17 PE=1 SV=3                                                                               | sp P18621 RL17_HU  | 21 kDa |      |      | 100% |

|                                                                                     |                   |         |      |      |
|-------------------------------------------------------------------------------------|-------------------|---------|------|------|
| V-type proton ATPase subunit B, brain isoform OS=Homo sapiens GN=ATP6V1B2 PE=1 SV=3 | sp P21281 VATB2_H | 57 kDa  | 100% |      |
| DNA replication licensing factor MCM7 OS=Homo sapiens GN=MCM7 PE=1 SV=4             | sp P33993 MCM7_H  | 81 kDa  | 100% |      |
| Flap endonuclease 1 OS=Homo sapiens GN=FEN1 PE=1 SV=1                               | sp P39748 FEN1_HU | 43 kDa  |      | 100% |
| Adenylyl cyclase-associated protein 2 OS=Homo sapiens GN=CAP2 PE=1 SV=1             | sp P40123 CAP2_HU | 53 kDa  | 100% |      |
| Ran GTPase-activating protein 1 OS=Homo sapiens GN=RANGAP1 PE=1 SV=1                | sp P46060 RAGP1_H | 64 kDa  |      | 100% |
| Serpin B8 OS=Homo sapiens GN=SERPINB8 PE=1 SV=2                                     | sp P50452 SPB8_HU | 43 kDa  | 100% |      |
| Transcription activator BRG1 OS=Homo sapiens GN=SMARCA4 PE=1 SV=2                   | sp P51532 SMCA4_H | 185 kDa |      | 100% |
| Translocon-associated protein subunit delta OS=Homo sapiens GN=SSR4 PE=1 SV=1       | sp P51571 SSRD_HU | 19 kDa  |      | 100% |
| Clathrin heavy chain 1 OS=Homo sapiens GN=CLTC PE=1 SV=5                            | sp Q00610 CLH1_HU | 192 kDa |      | 100% |
| Kinesin heavy chain isoform 5A OS=Homo sapiens GN=KIF5A PE=1 SV=2                   | sp Q12840 KIF5A_H | 117 kDa |      | 100% |
| Plastin-1 OS=Homo sapiens GN=PLS1 PE=1 SV=2                                         | sp Q14651 PLSI_HU | 70 kDa  |      | 100% |
| Poly(rC)-binding protein 1 OS=Homo sapiens GN=PCBP1 PE=1 SV=2                       | sp Q15365 PCBP1_H | 37 kDa  | 100% |      |
| DNA damage-binding protein 1 OS=Homo sapiens GN=DDB1 PE=1 SV=1                      | sp Q16531 DDB1_HU | 127 kDa |      | 100% |

|                                                                                                             |                   |         |      |      |      |
|-------------------------------------------------------------------------------------------------------------|-------------------|---------|------|------|------|
| Cleavage and polyadenylation specificity factor subunit 6<br>OS=Homo sapiens GN=CPSF6<br>PE=1 SV=2          | sp Q16630 CPSF6_H | 59 kDa  |      |      | 100% |
| Proteasome subunit alpha type-7-like<br>OS=Homo sapiens GN=PSMA8<br>PE=1 SV=3                               | sp Q8TAA3 PSA7L   | 29 kDa  |      | 100% |      |
| Phosphatidylglycerophosphatase and protein-tyrosine phosphatase 1<br>OS=Homo sapiens GN=PTPMT1<br>PE=1 SV=1 | sp Q8WUK0 PTPM1   | 23 kDa  |      |      | 100% |
| DnaJ homolog subfamily B member 3<br>OS=Homo sapiens GN=DNAJB3<br>PE=1 SV=1                                 | sp Q8WWF6 DNJB3   | 17 kDa  |      | 100% |      |
| Protein NDRG1<br>OS=Homo sapiens GN=NDRG1<br>PE=1 SV=1                                                      | sp Q92597 NDRG1   | 43 kDa  | 100% |      |      |
| Transportin-1<br>OS=Homo sapiens GN=TNPO1<br>PE=1 SV=2                                                      | sp Q92973 TNPO1_I | 102 kDa | 100% |      |      |
| Serpin B12<br>OS=Homo sapiens GN=SERPINB12<br>PE=1 SV=1                                                     | sp Q96P63 SPB12_H | 46 kDa  |      | 100% |      |
| Intraflagellar transport protein 27 homolog<br>OS=Homo sapiens GN=IFT27<br>PE=1 SV=1                        | sp Q9BW83 IFT27_I | 20 kDa  |      |      | 100% |
| Inosine triphosphate pyrophosphatase<br>OS=Homo sapiens GN=ITPA<br>PE=1 SV=2                                | sp Q9BY32 ITPA_H  | 21 kDa  |      |      | 100% |
| Ubiquitin-conjugating enzyme E2 O<br>OS=Homo sapiens GN=UBE2O<br>PE=1 SV=3                                  | sp Q9C0C9 UBE2O   | 141 kDa |      |      | 100% |
| 39S ribosomal protein L44, mitochondrial<br>OS=Homo sapiens GN=MRPL44<br>PE=1 SV=1                          | sp Q9H9J2 RM44_H  | 38 kDa  |      | 100% |      |
| Probable Xaa-Pro aminopeptidase 3<br>OS=Homo sapiens GN=XPNPEP3<br>PE=1 SV=1                                | sp Q9NQH7 XPP3_I  | 57 kDa  | 100% |      |      |



|                                                                                                          |                  |         |      |      |      |
|----------------------------------------------------------------------------------------------------------|------------------|---------|------|------|------|
| GTP-binding protein SAR1a<br>OS=Homo sapiens GN=SAR1A<br>PE=1 SV=1                                       | sp Q9NR31 SAR1A_ | 22 kDa  |      | 100% |      |
| Thyroid hormone receptor-<br>associated protein 3 OS=Homo<br>sapiens GN=THRAP3 PE=1<br>SV=2              | sp Q9Y2W1 TR150_ | 109 kDa |      |      | 100% |
| Non-structural maintenance of<br>chromosomes element 1<br>homolog OS=Homo sapiens<br>GN=NSMCE1 PE=1 SV=5 | sp Q8WV22 NSE1_I | 31 kDa  | 100% |      |      |
